# Supplementary material for: Structures of N-terminally processed KRAS provide insight into the role of N-acetylation
Source: PubMed Central journal article supplement (PMC6642148; doi:10.1038/s41598-019-46846-w), 2019-07-19
Supplement: 41598_2019_46846_MOESM1_ESM.pdf [file 41598_2019_46846_MOESM1_ESM.pdf]

# **Structures of N-terminally processed KRAS provide insight into the role of N-acetylation**

**Srisathiyarayanan Dharmaiah<sup>‡</sup>, Timothy H. Tran<sup>‡</sup>, Simon Messing<sup>‡</sup>, Constance Agamasu<sup>‡</sup>, William K. Gillette<sup>‡</sup>, Wupeng Yan<sup>‡</sup>, Timothy Waybright<sup>‡</sup>, Patrick Alexander<sup>‡</sup>, Dominic Esposito<sup>‡</sup>, Dwight V. Nissley<sup>‡</sup>, Frank McCormick<sup>‡,§</sup>, Andrew G. Stephen<sup>‡</sup>, and Dhirendra K. Simanshu<sup>‡,\*</sup>**

<sup>‡</sup>NCI RAS Initiative, Cancer Research Technology Program, Frederick National Laboratory for Cancer Research, Leidos Biomedical Research, Inc., Frederick, MD 21701, <sup>§</sup>Diller Family Comprehensive Cancer Center, University of California, San Francisco, CA 94158

## **Supplementary Information**

- Supplementary Table 1- 2
- Supplementary Figures 1- 8

**Supplementary Table 1: Crystallization conditions for KRAS structures described in this study.**

| <b>KRAS structures</b>                               | <b>Crystallization condition</b>                                                                                                                                                    |
|------------------------------------------------------|-------------------------------------------------------------------------------------------------------------------------------------------------------------------------------------|
| Mg <sup>2+</sup> -free KRAS (2-169)-GDP              | 0.056 M NaPO <sub>4</sub> .H <sub>2</sub> O, 1.344 M K <sub>2</sub> PO <sub>4</sub> , pH 8.2                                                                                        |
| Mg <sup>2+</sup> -bound KRAS (1-169)-GDP (P3)        | 0.2 M Mg <sup>2+</sup> Cl <sub>2</sub> , 0.1 M TRIS HCl pH 8.5, 30% PEG 4K                                                                                                          |
| Mg <sup>2+</sup> -bound KRAS (1-169)-GDP (C2)        | 6% 2-Propanol, 0.1 M NaOAc <sub>3</sub> H <sub>2</sub> O pH 4.5, 26% PEG MME 550                                                                                                    |
| Mg <sup>2+</sup> -free KRAS (2-166)-GMPPNP           | 200 mM Ammonium Fluoride, 20% PEG 3350                                                                                                                                              |
| Mg <sup>2+</sup> bound N-acetylated KRAS (2-169)-GDP | 10% w/v PEG 20 000, 20% v/v PEG MME 550, 0.1 M MES/imidazole pH 6.5, 0.02 M of each amino acid (L-Na-Glutamate; Alanine (racemic); Glycine; Lysine HCl (racemic); Serine (racemic)) |

**Supplementary Table 2. Data collection and refinement statistics.**

|                                                  | <b>Mg<sup>2+</sup>-free<br/>KRAS (2-169)-<br/>GDP</b> | <b>Mg<sup>2+</sup>-bound<br/>KRAS (1-169)-<br/>GDP (P3)</b> | <b>Mg<sup>2+</sup>-bound<br/>KRAS (1-169)-<br/>GDP (C2)</b> | <b>Mg<sup>2+</sup>-free<br/>KRAS (2-166)-<br/>GMPPNP</b> | <b>Mg<sup>2+</sup>-bound<br/>N-acetylated<br/>KRAS (2-169)-<br/>GDP</b> |
|--------------------------------------------------|-------------------------------------------------------|-------------------------------------------------------------|-------------------------------------------------------------|----------------------------------------------------------|-------------------------------------------------------------------------|
| <b>Data Collection</b>                           |                                                       |                                                             |                                                             |                                                          |                                                                         |
| <b>Resolution range (Å)</b>                      | 42.95 - 1.5<br>(1.55 - 1.5)                           | 41.92 - 1.45<br>(1.50 - 1.45)                               | 19.47 - 1.45<br>(1.5 - 1.45)                                | 35.45 - 1.35<br>(1.39 - 1.35)                            | 37.23-1.01<br>(1.05-1.01)                                               |
| <b>Space group</b>                               | P 3 2 <sub>1</sub>                                    | P 3                                                         | C 1 2 1                                                     | P 2 <sub>1</sub> 2 <sub>1</sub> 2 <sub>1</sub>           | C 1 2 1                                                                 |
| <b>Unit cell<br/>a, b, c (Å)<br/>α, β, γ (°)</b> | 77.86, 77.86, 55.73<br>90, 90, 120                    | 84.18, 84.18, 41.92<br>90 90 120                            | 66.29, 41.55,<br>115.38<br>90, 105.05, 90                   | 36.02, 37.91, 99.99<br>90, 90, 90                        | 65.19, 41.57,<br>115.41<br>90 104.58 90                                 |
| <b>Total reflections</b>                         | 226355 (22073)                                        | 161902 (16251)                                              | 185909 (18425)                                              | 208763 (19052)                                           | 865278 (25971)                                                          |
| <b>Unique reflections</b>                        | 31532 (3103)                                          | 58439 (5924)                                                | 52619 (5182)                                                | 30423 (2915)                                             | 148832 (11112)                                                          |
| <b>Multiplicity</b>                              | 7.2 (7.1)                                             | 2.8 (2.8)                                                   | 3.5 (3.6)                                                   | 6.9 (6.5)                                                | 5.8 (2.3)                                                               |
| <b>Completeness (%)</b>                          | 99.77 (99.65)                                         | 99.29 (100.0)                                               | 96.94 (96.32)                                               | 98.37 (95.82)                                            | 95.28 (71.39)                                                           |
| <b>Mean I/sigma(I)</b>                           | 18.71 (2.29)                                          | 8.73 (1.88)                                                 | 11.72 (2.27)                                                | 24.53 (6.84)                                             | 14.84 (1.02)                                                            |
| <b>Wilson B-factor (Å<sup>2</sup>)</b>           | 17.25                                                 | 13.40                                                       | 14.52                                                       | 8.99                                                     | 9.68                                                                    |
| <b>R-merge</b>                                   | 0.059 (0.678)                                         | 0.070 (0.46)                                                | 0.056 (0.510)                                               | 0.0481 (0.255)                                           | 0.0559 (0.6361)                                                         |
| <b>R-meas</b>                                    | 0.065 (0.731)                                         | 0.087 (0.572)                                               | 0.066 (0.602)                                               | 0.0521 (0.277)                                           | 0.0609 (0.7961)                                                         |
| <b>CC1/2</b>                                     | 0.999 (0.847)                                         | 0.993 (0.724)                                               | 0.998 (0.858)                                               | 1 (0.99)                                                 | 1 (0.904)                                                               |
| <b>Refinement</b>                                |                                                       |                                                             |                                                             |                                                          |                                                                         |
| <b>Reflections used in refinement</b>            | 31532 (3101)                                          | 58509 (5924)                                                | 52618 (5176)                                                | 30423 (2913)                                             | 148832 (11100)                                                          |
| <b>Reflections used for R-free</b>               | 2006 (202)                                            | 2964 (316)                                                  | 2007 (200)                                                  | 1519 (142)                                               | 1996 (153)                                                              |
| <b>R-work</b>                                    | 0.144 (0.214)                                         | 0.134 (0.187)                                               | 0.177 (0.245)                                               | 0.135 (0.160)                                            | 0.1445 (0.3575)                                                         |
| <b>R-free</b>                                    | 0.186 (0.289)                                         | 0.182 (0.240)                                               | 0.216 (0.299)                                               | 0.184 (0.209)                                            | 0.1663 (0.3748)                                                         |
| <b>CC (work)</b>                                 | 0.97 (0.93)                                           | 0.59 (0.16)                                                 | 0.97 (0.90)                                                 | 0.97 (0.94)                                              | 0.974 (0.797)                                                           |
| <b>CC (free)</b>                                 | 0.96 (0.89)                                           | 0.57 (0.19)                                                 | 0.96 (0.85)                                                 | 0.96 (0.90)                                              | 0.970 (0.709)                                                           |
| <b>Number of non-H atoms</b>                     | 1729                                                  | 3083                                                        | 3230                                                        | 1644                                                     | 3395                                                                    |
| <b>macromolecules</b>                            | 1469                                                  | 2705                                                        | 2824                                                        | 1422                                                     | 2859                                                                    |
| <b>ligands</b>                                   | 28                                                    | 79                                                          | 58                                                          | 37                                                       | 71                                                                      |
| <b>solvent</b>                                   | 232                                                   | 299                                                         | 348                                                         | 185                                                      | 465                                                                     |
| <b>Protein residues</b>                          | 168                                                   | 328                                                         | 340                                                         | 169                                                      | 334                                                                     |
| <b>RMS (bonds)</b>                               | 0.003                                                 | 0.003                                                       | 0.005                                                       | 0.009                                                    | 0.007                                                                   |
| <b>RMS (angles)</b>                              | 0.68                                                  | 0.67                                                        | 0.83                                                        | 1.05                                                     | 1.06                                                                    |
| <b>Ramachandran favoured (%)</b>                 | 98.80                                                 | 97.83                                                       | 99.11                                                       | 98.80                                                    | 99.09                                                                   |
| <b>Ramachandran allowed (%)</b>                  | 1.20                                                  | 2.17                                                        | 0.60                                                        | 1.20                                                     | 0.91                                                                    |
| <b>Ramachandran outliers (%)</b>                 | 0.00                                                  | 0.00                                                        | 0.30                                                        | 0.00                                                     | 0.00                                                                    |
| <b>Average B-factor (Å<sup>2</sup>)</b>          | 25.05                                                 | 22.35                                                       | 16.83                                                       | 12.58                                                    | 14.73                                                                   |
| <b>macromolecules</b>                            | 22.65                                                 | 21.09                                                       | 15.46                                                       | 11.21                                                    | 12.71                                                                   |
| <b>ligands</b>                                   | 17.51                                                 | 17.22                                                       | 14.47                                                       | 7.68                                                     | 13.51                                                                   |
| <b>solvent</b>                                   | 41.18                                                 | 35.15                                                       | 28.34                                                       | 24.15                                                    | 27.34                                                                   |

Statistics for the highest-resolution shell are shown in parentheses.

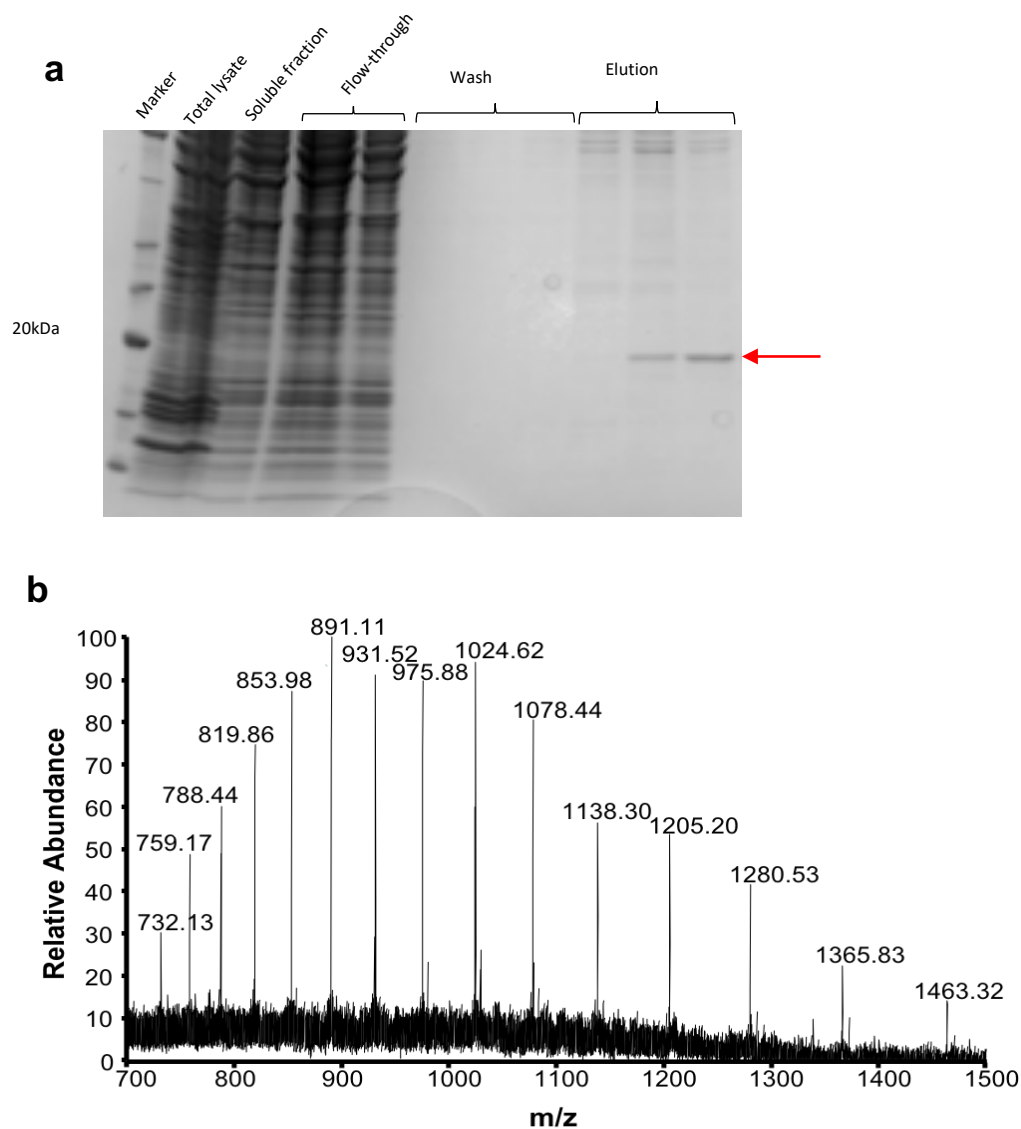

**Supplementary Figure 1: Mass spectroscopic characterization of KRAS4b expressed in HEK293 cells.** (a) SDS-PAGE analysis of human KRAS4b (1-171 with a C-terminal His8 tag) expressed in HEK293 cells and purified using immobilized metal affinity chromatography (IMAC). Red arrow denotes purified KRAS4b. (b) The electrospray ionization mass spectrometry (ESI-MS) spectrum of the purified protein is shown. The deconvoluted spectrum is shown in Figure 1.

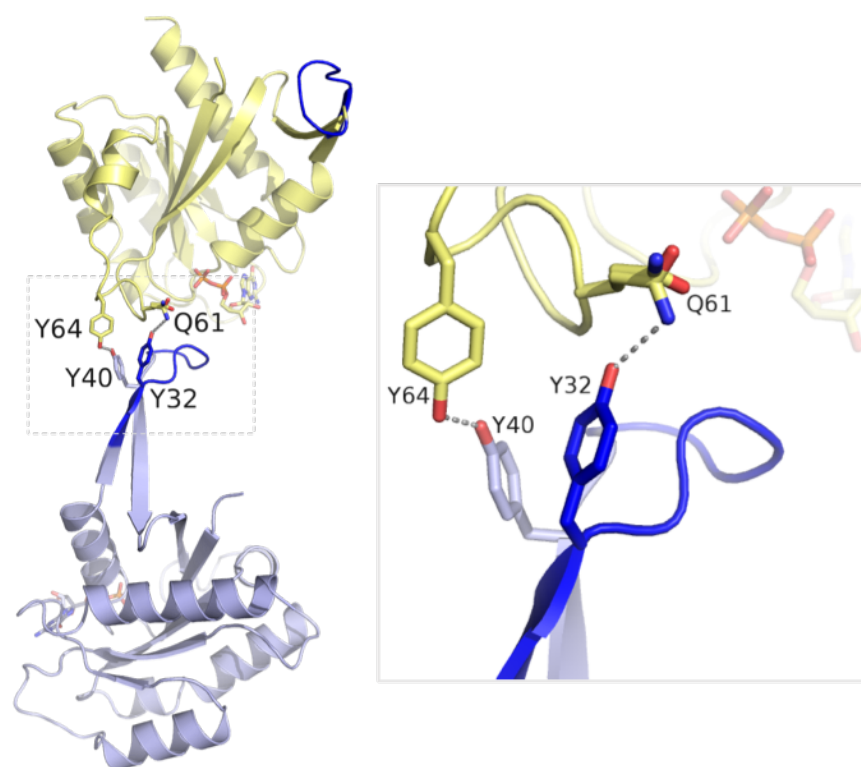

**Supplementary Figure 2: Interaction formed by switch I residues in the  $Mg^{2+}$ -free KRAS-GDP structure with the residues from the symmetry related KRAS molecule.** Residues Y32 and Y40 of  $Mg^{2+}$ -free KRAS-GDP (shown in light blue with switch I region highlighted in dark blue) present in the asymmetric unit form H-bonds with Q61 and Y64, respectively, from the symmetry related molecule. Enlarged view of this interaction (shown in box) is shown in the right panel.

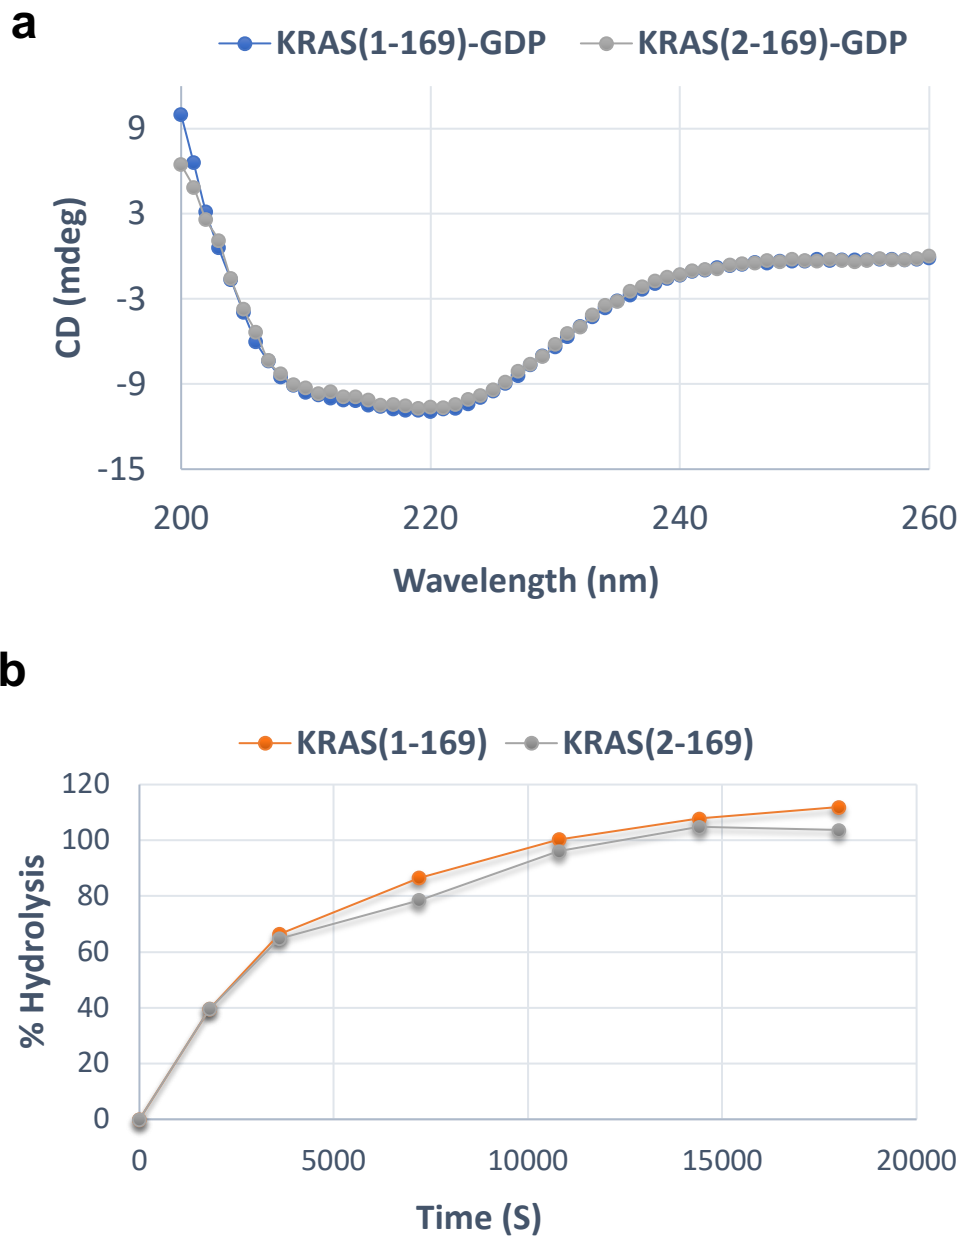

**Supplementary Figure 3: Comparison of secondary structural content and rate of intrinsic GTP hydrolysis for KRAS (1-169) and KRAS (2-169).** (a) Circular dichroism spectra for GDP-bound KRAS (1-169) and KRAS (2-169). (b) Plot showing rate of intrinsic GTP hydrolysis for KRAS (1-169) and KRAS (2-169).

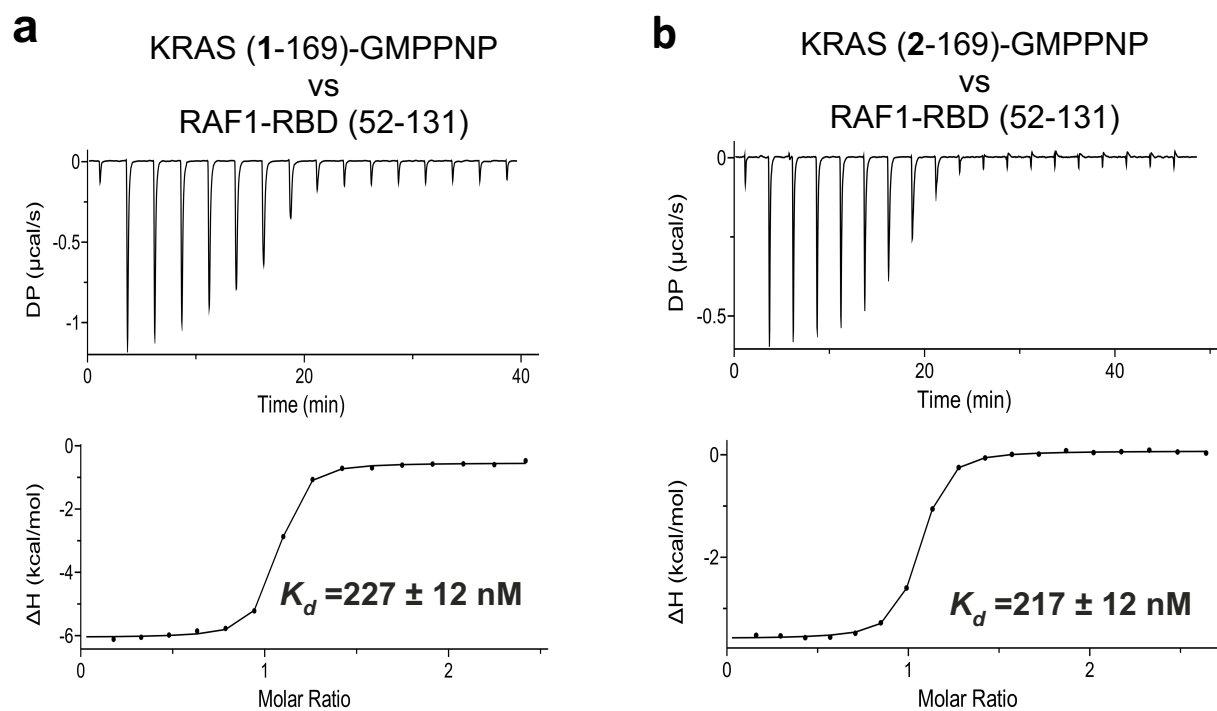

**Supplementary Figure 4. Binding affinity of GMPPNP-bound KRAS (1-169) and KRAS (2-169) with RAS-binding domain (RBD) of RAF1.** Isothermal titration calorimetry (ITC) experiments to measure the dissociation constant between (a) KRAS (1-169)-GMPPNP and RAF1-RBD and between (b) KRAS (2-169)-GMPPNP and RAF1-RBD. The DP is a measured differential power between the reference cell and the sample cell.

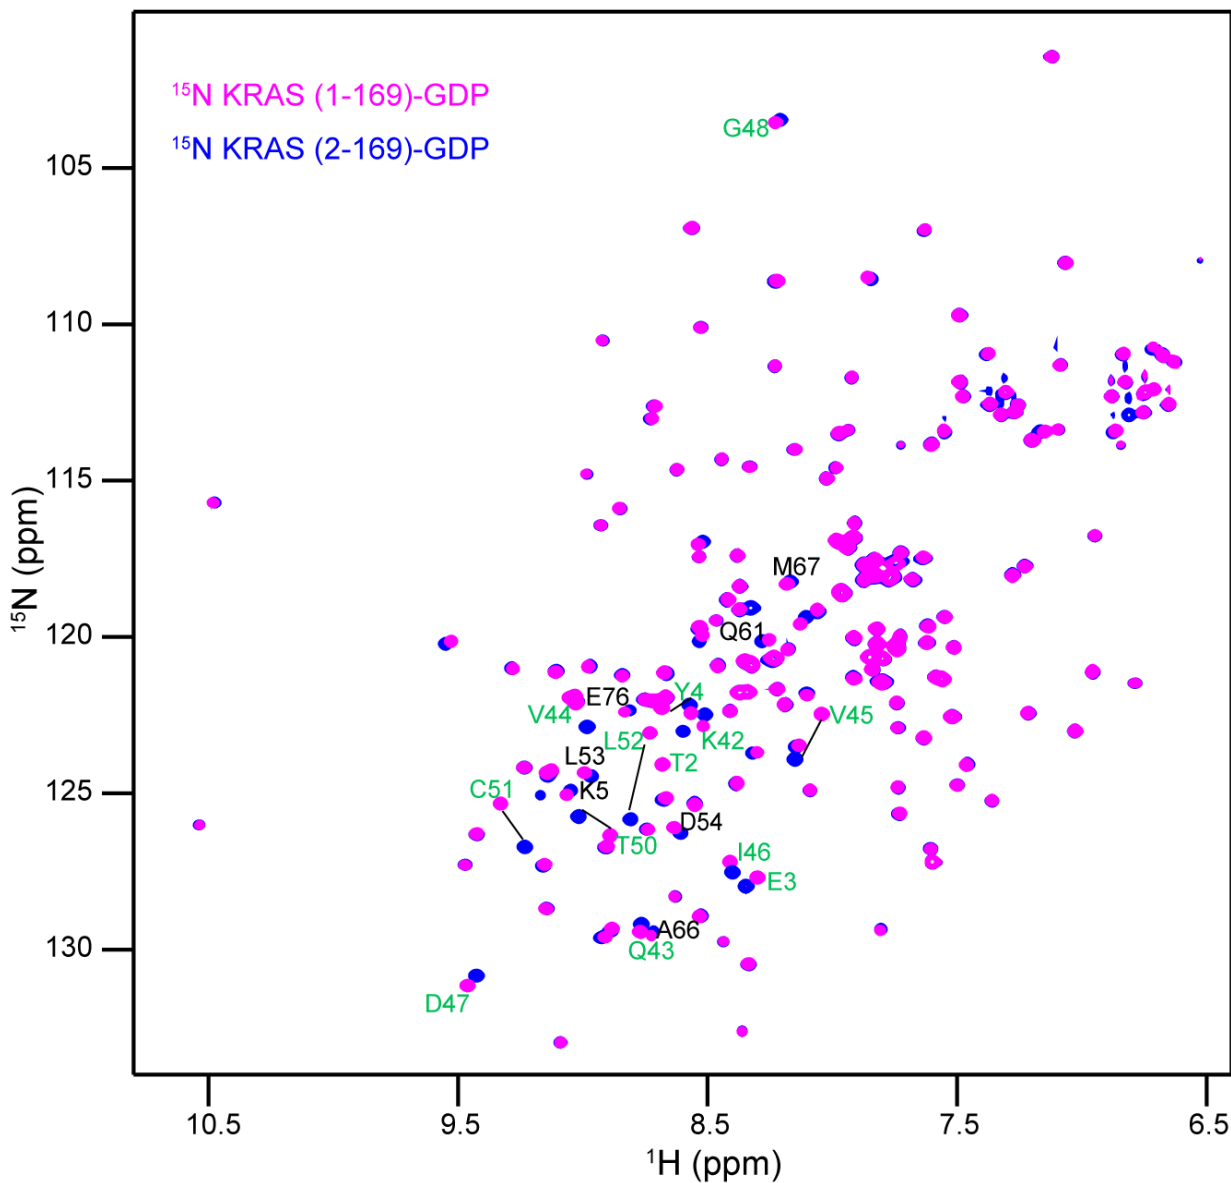

**Supplementary Figure 5. Comparison of HSQC spectra obtained for GDP-bound KRAS (2-169) and KRAS (1-169).** 2D  $^1\text{H}$ - $^{15}\text{N}$  HSQC spectra obtained for  $^{15}\text{N}$ -labeled KRAS (1-169) (magenta) and free  $^{15}\text{N}$  labeled KRAS (2-169) (blue). Amide signals that exhibited substantial chemical shift differences are labeled in green.



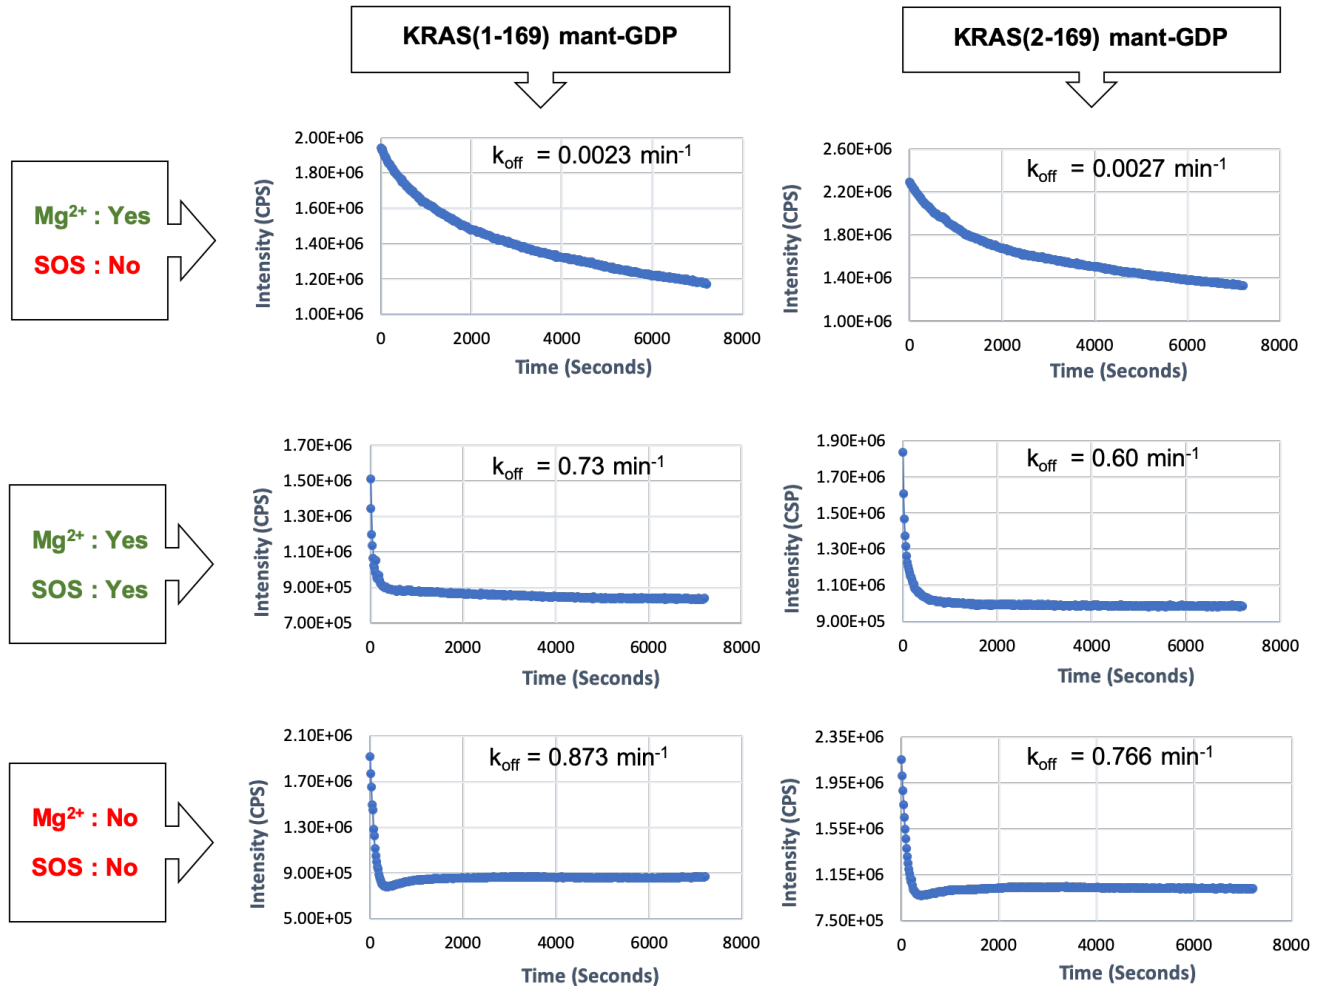

**Supplementary Figure 6: Intrinsic and SOS-mediated nucleotide exchange rate for KRAS proteins in the presence and absence of initiator methionine.** In the presence of  $Mg^{2+}$  in the reaction mixture, both KRAS proteins (1-169 and 2-169) showed similar rates for intrinsic and SOS-mediated nucleotide exchange. However, in the absence of  $Mg^{2+}$  in the reaction mixture, both KRAS proteins showed intrinsic exchange rates higher than the SOS-mediated exchange rate obtained in the presence of  $Mg^{2+}$ . When SOS was added to this  $Mg^{2+}$ -free reaction mixture, the reaction occurred so rapidly that the majority of the nucleotide was displaced before the first measurement was made (data not shown).

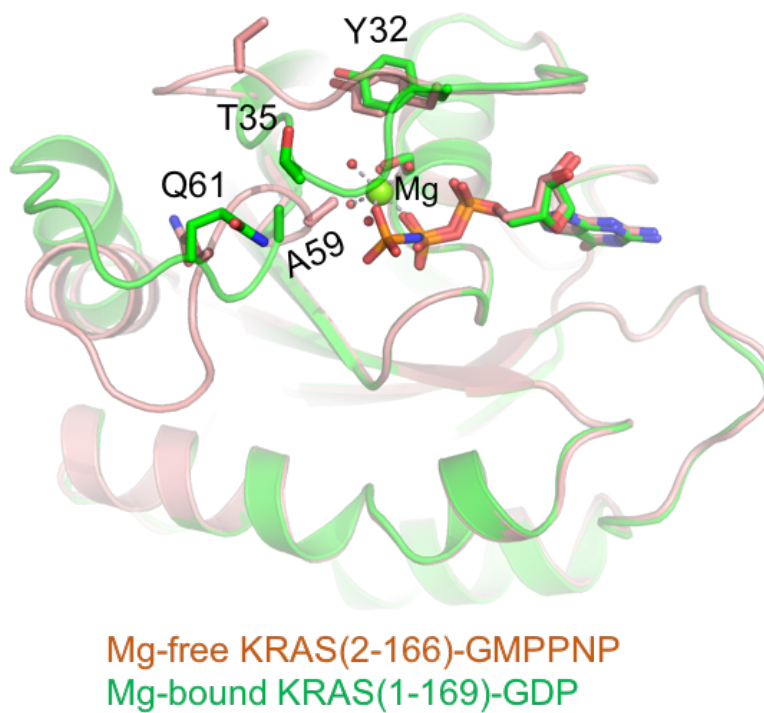

**Supplementary Figure 7: Structural superposition of Mg<sup>2+</sup>-free KRAS (2-166)-GMPPNP with Mg<sup>2+</sup>-bound KRAS (1-169)-GDP structures.** KRAS is shown in ribbon representation, GDP and sidechain atoms of KRAS are shown in stick representation.

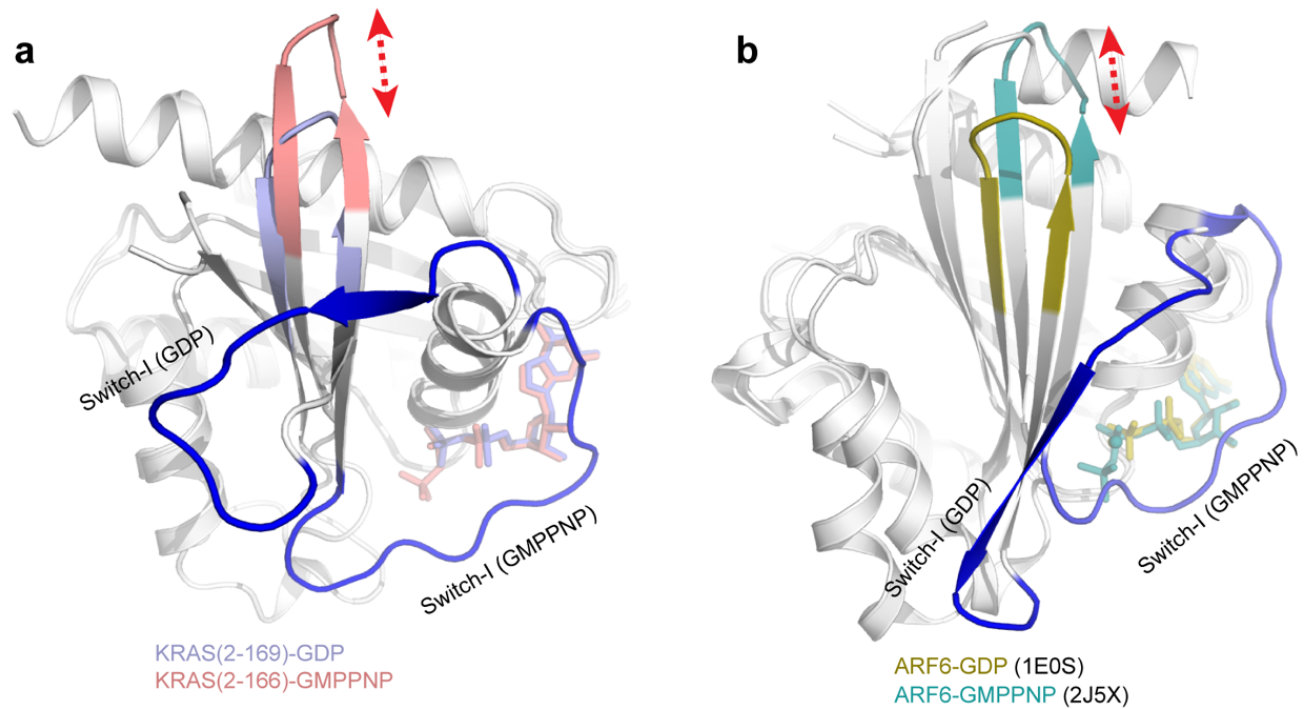

**Supplementary Figure 8:  $Mg^{2+}$ -free KRAS structures resemble conformational changes seen previously in  $Mg^{2+}$ -bound ARF6 structures.** Structural superposition of (a)  $Mg^{2+}$ -free GDP/GMPPNP-bound KRAS structures and (b)  $Mg^{2+}$ /GDP/GMPPNP-bound ARF6 structures showing presence of additional  $\beta$ -strand in the switch I region as well as conformational changes in the turn between  $\beta 2$  and  $\beta 3$  strands.
